# Genomic and Chemical Diversity in *Cannabis*

Ryan C. Lynch<sup>\*1,5</sup>, Daniela Vergara<sup>1</sup>, Silas Tittes<sup>1</sup>, Kristin White<sup>1</sup>, C. J. Schwartz<sup>2</sup>, Matthew J. Gibbs<sup>2</sup>, Travis C. Ruthenburg<sup>3,4</sup>, Kymron deCesare<sup>3</sup>, Donald P. Land<sup>3</sup> and Nolan C. Kane<sup>\*1</sup>

<sup>1</sup> University of Colorado Boulder, Department of Ecology and Evolutionary Biology

<sup>2</sup> Marigene Inc.

<sup>3</sup> Steep Hill Labs Inc.

<sup>4</sup> current address: SC Laboratories Inc. 4000 Airport Way South, Seattle, WA 98108

<sup>5</sup> current address: Medicinal Genomics Corporation, 12 Gill St. Suite 3700, Woburn, MA 01801

\* Correspondence: [nolan.kane@colorado.edu](mailto:nolan.kane@colorado.edu) or [rlynch@colorado.edu](mailto:rlynch@colorado.edu)

## Abstract

Plants of the *Cannabis* genus are the only producers of phytocannabinoids, terpenoid compounds that strongly interact with evolutionarily ancient endocannabinoid receptors shared by most bilaterian taxa. For millennia, the plant has been cultivated for these compounds, but also for food, rope, paper, and clothing. Today, specialized varieties yielding high-quality textile fibers, nutritional seed oil or high cannabinoid content are cultivated across the globe. However, the genetic identities and histories of these diverse populations remain largely obscured. We analyzed the nuclear genomic diversity among 339 *Cannabis* varieties, and demonstrate the existence of at least three major groups of diversity. As well as being genetically distinct, each group produces unique cannabinoid and terpenoid content profiles. This combined analysis of population genomic and trait variation informs our understanding of the potential uses of different genetic variants for medicine and agriculture, providing valuable insights and tools for a rapidly emerging, valuable legal industry.

Keywords: marijuana, hemp, phylogeny, population structure, cannabinoids, terpenoids

Plants of the genus *Cannabis* (Cannabaceae; hemp, drug-type) have been used for thousands of years for fiber, nutritional seed oil and medicinal or psychoactive effects. Archaeological evidence for hemp fiber textile production in China dates to at least as early as 6,000 years ago<sup>1</sup>, but possibly as early as 12,000 years ago<sup>2</sup>, suggesting *Cannabis* was one of the first domesticated fiber plants. Archeological evidence for medicinal or shamanistic use of *Cannabis* has been found at Indian, central-Asian and middle-eastern sites<sup>3</sup>, further illustrating the widespread extent of *Cannabis* utilization throughout human history. A central Asian site of domestication is often cited<sup>4</sup>, although genetic analyses suggest two independent domestication events may have occurred separately<sup>5</sup>.

*Cannabis* plants are usually annual wind-pollinated dioecious herbs, though individuals may live more than a year in subtropical climates<sup>6</sup> and monoecious populations exist<sup>7</sup>. The taxonomic composition of the genus remains unresolved, with two species (*C. indica* and *C. sativa*) commonly cited<sup>8</sup>, although *C. ruderalis* is sometimes proposed as a third species that contains northern short-day or auto-flowering plants<sup>9</sup>. Monospecific treatment of the genus as *Cannabis sativa* L. is also common<sup>10</sup> and various alternative nomenclature schemes (e.g. *Cannabis sativa* subsp. *indica* var. *kafiristanica*) are sometimes referenced (reviewed in<sup>4</sup>). Even though an extensive monograph on the genus has recently been published<sup>11</sup>, limited genetic and experimental data leaves the questions of taxonomy unresolved<sup>12,13</sup>.

The geographical and ecological range of *Cannabis* is unusually broad, with cultivated populations growing outdoors on every continent except Antarctica in a wide range of environments from sub-arctic to temperate to tropical, and from sea level to over 3,000 meters elevation<sup>14,15</sup>. Feral or wild populations are also found as far north as the edge of the Arctic Circle in Eurasia, but are most common in well drained soils of temperate continental ecosystems in Eurasia and North America, while tropical populations are absent or rare<sup>14</sup>. Perhaps unsurprising,

given this diversity of habitats, the species contains extensive phytochemical diversity, particularly in cannabinoid and terpenoid profiles<sup>5,16</sup>, and also shows extensive diversity of morphological and life-history characteristics, further fueling debate regarding the taxonomic status and origins of *Cannabis* domestication.

One distinctive feature of the *Cannabis* genus is the production of a tremendous diversity of compounds called *cannabinoids*, so named because they are not produced at high levels in any other plant species<sup>17</sup>. Cannabinoids are a group of at least 74 known C<sub>21</sub> terpenophenolic compounds<sup>18,19</sup> responsible for many reported medicinal and psychoactive effects of *Cannabis* consumption<sup>20</sup>. Some estimates for the total number of phytocannabinoids range to well over a hundred<sup>21</sup>, though this number includes breakdown products as well as compounds found at extremely low levels. The plants produce a non-psychoactive carboxylic acid form of these compounds, with heating required to convert cannabinoids into the psychoactive decarboxylated forms. Interestingly, these compounds have pronounced neurological effects on a wide range of vertebrate and invertebrate taxa, suggesting an ancient origin of the endocannabinoid receptors, perhaps as old as the last common ancestor of all extant bilaterians, over 500 MYA<sup>22</sup>. The plant compounds thus produced have the potential to affect a broad range of metazoans, though their ecological functions in nature are not well understood. Indeed, suggested roles for these compounds include many biotic and abiotic defenses, such as suppression of pathogens and herbivores, protection from UV radiation damage, and attraction of seed dispersers. These hypotheses about the selective benefits of cannabinoid production remain speculative, as none have been conclusively verified to date. We do know more, however, about the more recent evolution of the plants under human cultivation.

High delta-9-tetrahydrocannabinolic acid (THCA)<sup>23</sup> content has been selected for in many strains due to its potential to be converted to delta-9-tetrahydrocannabinol (THC), which has potent psychoactive<sup>24</sup>, appetite-stimulating<sup>25</sup>, analgesic<sup>26</sup> and antiemetic<sup>27</sup> effects. These effects are mediated through interactions with human endocannabinoid CB1 receptors found in the brain<sup>28</sup>, and CB2 receptors, which are concentrated in peripheral tissues<sup>29</sup>. Other THC receptor binding locations are hypothesized as well<sup>30</sup>. After several decades of accelerated clandestine cultivation technique and breeding improvements, modern strains can now yield dried un-pollinated pistillate inflorescence material that contains over 30% THCA by dry-weight<sup>31</sup>. However, other cannabinoids may also be present in high concentrations. In particular, high cannabidiolic acid (CBDA) plants were historically used in some hashish preparations<sup>32</sup> and are presently in high demand as an anti-seizure therapy<sup>33</sup>. In contrast with THC, which acts as a partial agonist of the CB1 and CB2 receptors, CBD does not have as strong psychoactive properties, and instead has antagonist activity on agonists of the CB1- and CB2-receptors<sup>34</sup>. Thus, the two most abundant cannabinoids produced in *Cannabis* have, to some degree, opposing neurological effects.

THCA and CBDA are alternative products of a shared precursor, CBGA<sup>35</sup>. A single locus with co-dominant alleles was proposed to explain patterns of inheritance for THCA to CBDA ratios<sup>7,36</sup>. However more recent quantitative trait loci (QTL) mapping experiments<sup>37</sup>, expression studies<sup>38</sup> and genomic analyses<sup>10</sup> paint a more complex scenario with several linked paralogs responsible for the various THCA and CBDA phenotypes. Other cannabinoids such as cannabigerol (CBG)<sup>39</sup>, cannabichromene (CBC)<sup>40</sup> and delta-9-tetrahydrocannabivarin (THCV)<sup>41</sup> demonstrate pharmacological promise, and can also be produced at high levels by the plant<sup>42-44</sup>. Additionally, *Cannabis* secondary metabolites such as terpenoids and flavonoids likely contribute

to therapeutic or psychoactive effects<sup>2</sup>, such as  $\beta$ -myrcene, humulene and linalool proposed to produce sedative effects associated with specific strains<sup>45</sup>.

In this study, plants that produce low levels of total cannabinoids are herein referred to as hemp, while high cannabinoid producing varieties are described as drug-type strains. Legal definitions often use a maximum THCA threshold to delineate hemp from drug-types, thus some high CBDA producing strains are categorized as hemp. However this definition ignores the broader traditional usage of hemp for fibers or seed oils and historical presence of CBDA-producing alleles in some drug-type populations<sup>32</sup>. Additionally, hemp strains have a distinct set of growth characteristics, with fiber varieties reaching up to 6 meters in height during a growing season, exhibiting reduced flower set, increased internodal spacing and lower total cannabinoid concentration per unit mass compared to drug-type relative. Despite the widespread prohibition of drug-type *Cannabis* cultivation from the 1930s to present, hemp cultivation and breeding continued in parts of Europe and China through this period, and experienced a brief comeback during World War II in the USA through the Hemp for Victory campaign. Studies to date have found hemp varieties are genetically distinct from drug-type strains<sup>10</sup>, though interestingly Hillig<sup>5</sup> found broad leaflet southeastern Asian hemp landraces to be more closely related to Asian drug-type strains than to European hemp strains.

*Cannabis* has a diploid genome ( $2n = 20$ ), and an XY/XX chromosomal sex-determining system. The genome size is estimated to be 818 Mb for female plants and 843 Mb for male plants<sup>46</sup>. Currently a draft genome consisting of 60,029 scaffolds is available for the Purple Kush (PK) drug-type strain from the National Center for Biotechnology Information. Additional whole genome data is available from NCBI for the Finola and USO31 hemp strains. Various reduced representation genome, gene and RNA sequence data are also available from NCBI. Presently

*Cannabis* is the only multi-billion dollar legal crop without a sequence-based genetic linkage or physical genome map. Indeed, the first genetic map for the species, using AFLP and microsatellite markers, was only recently published, providing for the first time, quantitative trait mapping of cannabinoid content and other traits<sup>37</sup>.

Initial studies of *Cannabis* genetic diversity examined either many samples with few molecular markers<sup>5</sup> or whole genome wide data for relatively few samples types<sup>10</sup>. Sawler et al.<sup>47</sup> recently published a survey of *Cannabis* genomic diversity, using a reduced genomic representation strategy to evaluate 81 marijuana (drug-type) and 43 hemp strains. The aim of this present study is to assess the genomic diversity and phylogenetic relationships among 339 total *Cannabis* plants that have distinct phenotypes, and that were described *a priori* by plant breeders as various landraces, *indica*, *sativa*, hemp and drug-types, as well as commercially available hemp and drug-types with unclear pedigrees. We have combined data from existing sources and generated new data to create the largest sample set of *Cannabis* genomic sequence data published to date. These data and analyses will continue to facilitate the development of modernized breeding and quality assurance tools, which are lacking in the nascent legal *Cannabis* industry.

## Materials and Methods

**Sample collection.** DNA was obtained from numerous sources, including a variety of breeding and production facilities. The strain names, descriptions and putative origins used in this paper were recorded from the providers of the DNA and sequence data (Supplementary Table 1). For

data not previously published, DNA extractions were performed using the Qiagen DNeasy Plant Mini Kit (Valencia, CA) according to the manufacturer's protocol.

**Whole genome shotgun (WGS) sequencing.** 60 samples were sequenced using standard Illumina multiplexed library preparation protocols for two 2 x 125 HiSeq 2500 lanes and one 2 x 150 NextSeq 500 run. Sequencing efforts were targeted for approximately 4-6x coverage of the *Cannabis* genome per sample.

**Genotype-by-Sequencing (GBS).** 182 samples were sequenced on two 1 x 100 HiSeq 2500 lanes, following a multiplexed library preparation protocol described previously<sup>48</sup>.

**Publicly available data.** We obtained three WGS datasets available from NCBI<sup>10</sup> and received seven additional WGS datasets from Medicinal Genomics Corporation ([www.medicinalgenomics.com](http://www.medicinalgenomics.com)). GBS data for 143 samples from Sawler et al.<sup>47</sup> were also included in this study.

**Sequence Processing, Alignment and SNP calling.** Trimmomatic<sup>49</sup> was used to trim any remaining adaptor sequence from raw fastq reads and remove sequences with low quality regions or ambiguous base calls using the following settings:

ILLUMINACLIP:IlluminaAdapters:2:20:10 LEADING:20 TRAILING:20

SLIDINGWINDOW:5:15 MINLEN:100. Trimmed raw reads from the 67 total WGS samples were then aligned to the only publicly available draft genome of PK (JH226140-JH286168) using the Burrows-Wheeler Alignment tool (BWA mem)<sup>50</sup>. Chloroplast and mitochondrial



regions were excluded. We collated the individual alignments to produce a single variant call format table (.vcf) for all samples using samtools mpileup -uf | bcftools view -bvcg<sup>51</sup>. We filtered the vcf table to include only high quality informative SNP sites using vcftools<sup>52</sup>, bash and awk with the following vcf parameters: Q (>200), GQ (>10), AF1 (.1 - .9), biallelic sites only and no ambiguous bases. Next, data filters were applied through plink<sup>53</sup> to require that individuals have a minimum 50% informative sites and that sites each have data for minimum 20% of samples. Finally we used an estimate of expected coverage for the single copy portion of the genome based on the estimated genome size and number of reads being aligned. This was adjusted empirically based on total coverage level (across all WGS samples) per SNP site (Supplementary Figure 1) and bounded by a 95% Poisson confidence interval (mean 362x coverage). Further removal of repetitive content was achieved by aligning the PK reference to itself with BLASTN and removing all sites that were within regions of  $\geq 97\%$  identity for at  $\geq 500$  bp alignments. These aforementioned processing, alignment and SNP calling procedures were then performed separately on the 182 GBS samples generated for this study and the 143 GBS samples previously published<sup>47</sup>, resulting in three vcf tables and filtered SNP sets. GBS SNPs were additionally required to have a minimum of 5x coverage per sample. Due to limited overlap between the SNP sites produced by the two GBS libraries, most downstream analyses were performed separately for each GBS library along with its corresponding set of WGS SNPs. Code used for these analyses is available at <https://github.com/KaneLab>.

**SNP Analyses.** To visualize genetic relationships, divergence, and ancestral hybridization among lineages, a phylogenetic neighbor network was inferred using simple p-distance calculations<sup>54</sup>. Heterozygosity counts and Multidimensional Scaling (MDS) analyses were

calculated with Plink<sup>53</sup>. Average within and between group genetic distances, and a 45 SNP alignment neighbor joining tree based on p-distances, were calculated with MEGA6<sup>55</sup>. Population structure inferences were made through FastStructure<sup>56</sup> and FLOCK<sup>57</sup>. Tests for reticulation within the trees and admixture between populations were performed in TreeMix<sup>58</sup>.  $F_{ST}$  estimates were calculated with vcftools<sup>52</sup>.

**Chemical Analyses of Genetic Groups.** The cannabinoid and terpenoid information (chemotype) for a portion of the strains in the genome analysis were generated by Steep Hill Labs (<http://steephill.com/>). Only strains with matching data in the genomic analysis were analyzed, for a total of 112 individuals from 17 strains from the BLDT group, 278 individuals from 35 unique strains from the NLDT group, and 33 individuals from two strains of hemp, for a total of 423 individuals in this analysis (Supplementary Table 1). This chemotype analysis was performed using high performance liquid chromatography (HPLC) with Agilent (1260 Infinity, Santa Clara, CA) and Shimadzu (Prominence HPLC, Columbia, MD) equipment. Between 400 and 600 milligrams of each sample was extracted into methanol, diluted and analyzed by HPLC. A mobile phase consisting of 0.1% formic acid in water and 0.1% formic acid in methanol was used with a gradient starting at 72% methanol and ending at 99% methanol. Terpenoid standards were purchased from Sigma-Aldrich (St. Louis, MO). Cannabinoid standards were purchased from Cerilliant (Round Rock, TX), RESTEK (Bellefonte, PA) and Lipomed (Cambridge, MA). A C18 column from RESTEK (Raptor ARC-18, Bellefonte, PA) or Phenomenex (Kinetex C18, Torrance, CA) was used. Concentrations of cannabinoids without commercially available standards were estimated using published absorptivities<sup>59</sup>. The chemotype data analyzed for this research includes 13 cannabinoids and eight terpenoids. Each compound was quantified using a

linear calibration curve. Analytes were measured as percent mass in sample and not corrected for moisture content.

We performed a one-way ANOVA for each cannabinoid and terpenoid separately, with the group (NLDT, BLDT, and hemp) as the predictor variable. We used Bonferroni corrections for multiple comparisons. We also implemented a Principal Component Analysis (PCA) with prcomp function in base R, and car was used to visualize 95% confidence ellipses for each group (www.R-project.org). Individuals with missing data values for any cannabinoid or terpenoid were removed. After removing the individuals with missing values, we had a total of 351 individuals: 94 BLDT, 229 NLDT, and 28 hemp.

## Results and Discussion

**Sequencing and SNPs.** Summary information and raw sequencing libraries are publically available from the NCBI short read archive (accessions pending). Detailed information about all samples can be found in Supplementary Table 1 and examples of wide and narrow leaflet forms are shown in Figure 1. Of the 466,427,059 non-ambiguous base pairs in the PK reference, 77,810,563 bps were removed due to excess self-similarity ( $\geq 97\%$  identity and  $\geq 500$  bps length, Supplementary Figure 1). After this filter, the total single copy portion the PK reference within the combined coverage levels for all 67 WGS samples of 326x – 401x, a 95% Poisson confidence interval around a 362x mean, was 71,236,365 bps (Supplementary Figure 1). After quality (Q), genotype quality (GQ), allele frequency (AF), missing data, biallelic and ambiguous base filters, the following SNP counts remained: 491,341 WGS, 2,894 GBS (this study), SNPs 4,105 GBS (Sawler<sup>47</sup>). Forty-five SNPs overlapped both GBS datasets, and the WGS samples.

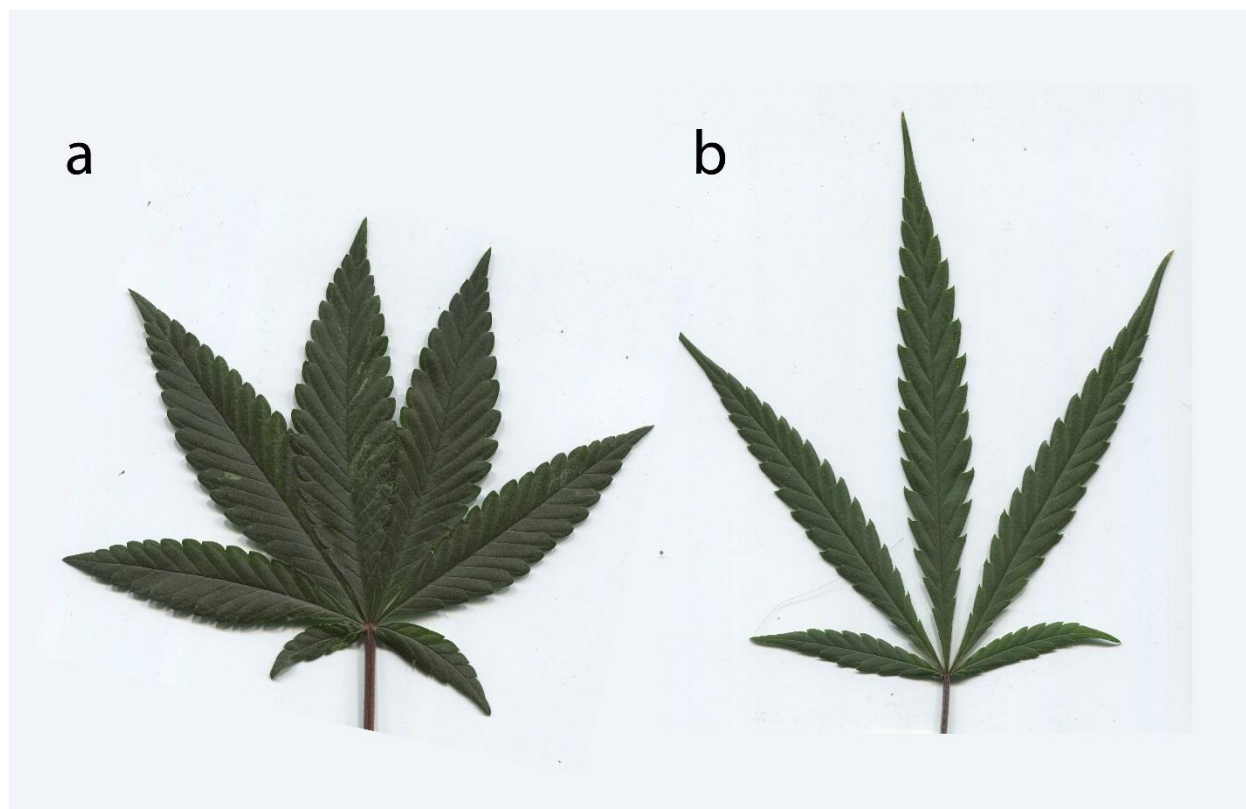

Figure 1. Example of broad leaflet type (a, R4) and narrow leaflet type (b, Super Lemon Haze) strains. Photograph credits: D. Vergara.

**Phylogenetic Relationships.** Bifurcating trees are commonly used to model mutation driven divergence and speciation events. Whole genome wide sequence datasets include information about recombination, hybridization, and gene loss or genesis events, some of which may be incongruent with one and other<sup>54</sup>. Phylogenetic networks can represent incompatible phylogenetic signals across large character matrices in a visually informative manner. Figure 2 contains 195 *Cannabis* samples including WGS and GBS data, and shows that all European hemp strains form a distinct clade, separated from drug-type strains by a consistent band of parallel branches. Broad leaflet drug-type strains clustered with purported Afghan Kush landrace samples (Supplementary Table 1 and Supplementary Figure 3), while narrow leaflet drug-type

strains appear to contain several groups with only faint visible distinctions between them,  
perhaps influenced by the inclusion of hybrid strains in the analysis.

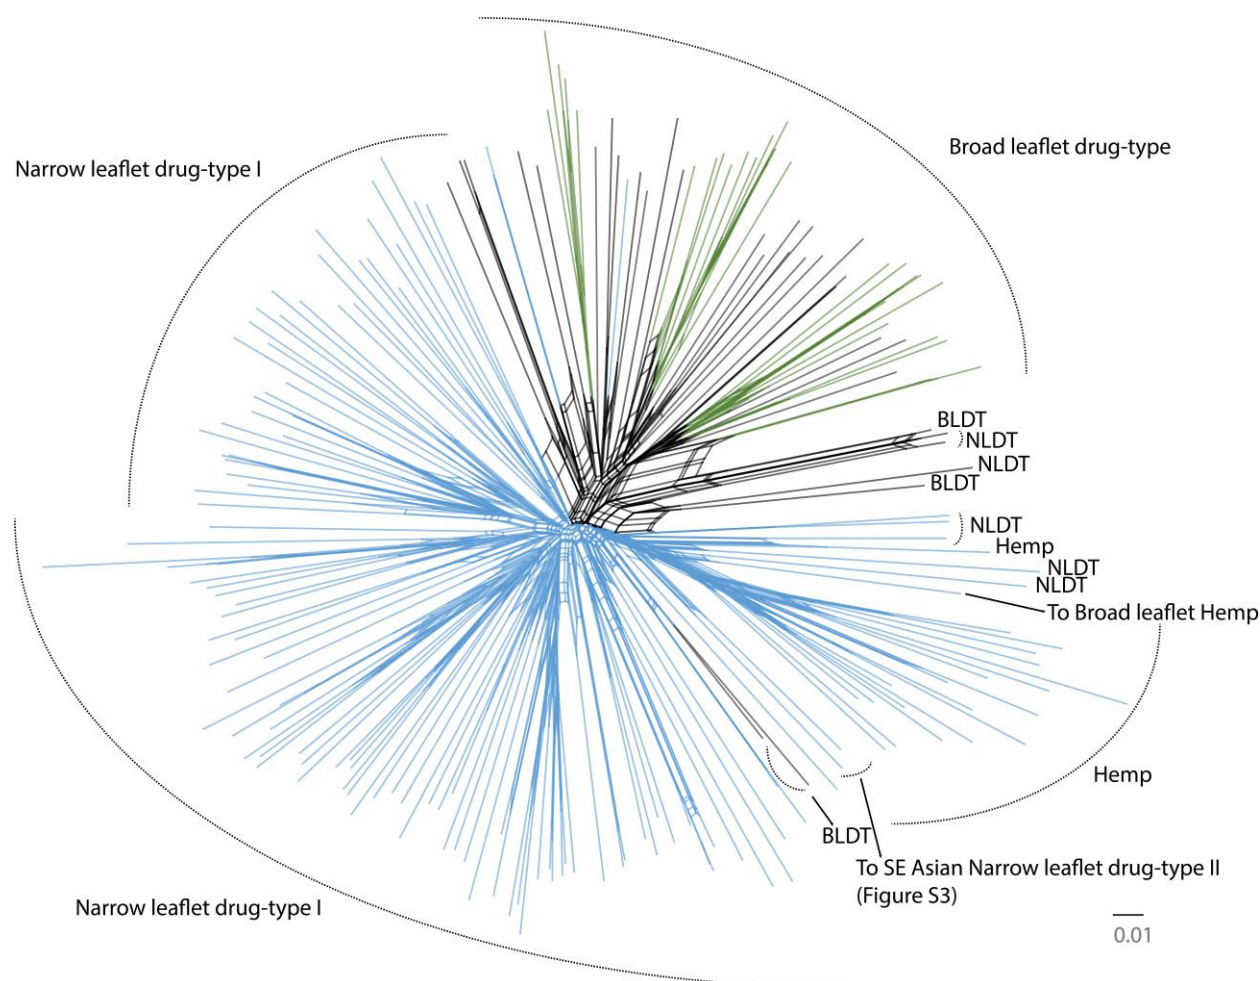

Figure 2. Phylogenetic neighbor network of a 2,894 SNP alignment from the single-copy portion of the *Cannabis* genome. Clade names on the periphery were inferred via FLOCK (where  $K \geq 3$  was most likely). Colored branches indicate fastStructure population membership of  $\geq 70\%$  assignment (where  $K=2$  was most likely). NLDT = Narrow Leaflet Drug-Type and BLDT = Broad Leaflet Drug-Type. To SE Asian NLDT II points to Dr. Grinspoon and Somali Taxi Cab samples. To Broad Leaflet Hemp points to a Chinese hemp sample. A high-resolution version of this figure that includes each sample name is available from: [http://figshare.com/articles/Cannabis\\_Tree/1585470/1](http://figshare.com/articles/Cannabis_Tree/1585470/1)

We found significantly more heterozygosity in drug-type strains than in hemp varieties (31 % v 22 %,  $p < 0.001$ , two-tailed Mann-Whitney U-test, Table 1). This likely reflects the

widespread hybridization of strains in North America during the transition to indoor cultivation of drug-types starting in the 1970s<sup>60</sup>, as well as the extensive reliance on clonal propagation for indoor commercial cultivation, which does not require trait stable seed stock. Conversely, fiber and seed oil hemp are grown on multi-acre scales that have necessitated the stabilization of agronomically important traits in seed stocks, likely leading to reduced heterozygosity at some loci.

|                        | Mean Within Distances  | Heterozygosity % |
|------------------------|------------------------|------------------|
| Hemp                   | 0.195                  | 0.22*            |
| All Drug-types         | 0.244                  | 0.31*            |
| NLDT                   | 0.237                  | 0.32             |
| BLDT                   | 0.221                  | 0.30             |
|                        | Mean Between Distances | F <sub>ST</sub>  |
| Hemp v. All Drug-types | 0.273                  | 0.098530         |
| Hemp v. NLDT           | 0.269                  | 0.091679         |
| Hemp v. BLDT           | 0.281                  | 0.10131          |
| NLDT v. BLDT           | 0.258                  | 0.036156         |

Table 1. Summary of genetic distance, heterozygosity and F<sub>st</sub> information for major *Cannabis* groups. \* = significantly different (p < 0.001, two-tailed Mann-Whitney U-test).

**Population Structure.** To determine the statistical likelihood of various population scenarios represented in our samples, we first applied the FLOCK model to our data set of 195 GBS and WGS *Cannabis* samples, which is an iterative reallocation clustering algorithm that does not require non-admixed individuals to make population assignments<sup>57</sup>. Using the K-partitioning method suggested by the authors<sup>57</sup>, we determined that  $K \geq 3$ , after testing K values of one to eight (Table 2 and peripheral population names in Figure 2). FLOCK was able to assign all samples to one of the three populations, although it does not calculate admixture proportions. Sample population assignments were largely consistent with the known history of these samples,



297 and appear visually consistent with MDS analysis (Supplementary Figure 2). For example all  
 298 fiber and seed oil hems were assigned to an exclusive population, with the exception of sample  
 299 AC/DC, a high CBDA producing variety, with likely hybrid hemp origins (Figure 2, Table 2).

|                      |                         |                    |                          |                         |
|----------------------|-------------------------|--------------------|--------------------------|-------------------------|
| A-train              | Original_Sour_Diesel    | C36                | H11                      | Schemp                  |
| Afghan_Kush          | Phantom_Cookies         | C37                | H5                       | Skunk_#1                |
| Afghan_Kush          | Platinum_OG             | Canna_Tsu          | Harlequin                | Somali_Taxi_Cab         |
| Afghan_Kush          | Purple_Kryptonite       | Cannatonic         | Hash_Plant               | Spectrum-11             |
| Afghan_Kush          | Purple_Kush             | CBD_Diesel         | Hawaiian                 | Spectrum-14             |
| Afghan_Kush          | Purple_Urkle            | CBD_Shark_F-6      | Holy_Grail               | Super_Lemon_Haze        |
| Boss_Hogg            | R4                      | CBD-0              | Holy_Grail_Kush          | Sweet_Afghani_Delicious |
| Bubba_Kush           | San_Fran_Valley_OG_Kush | CBD18              | Jack_47                  | Sweet_Skunk             |
| Char_Tango           | Screaming_Haze          | Charlottes_Web     | Jack_Flash               | Tangerine_Haze          |
| Chem_91'             | SFV                     | Cheese_Quake       | Jack_Herer               | Train_Wreck             |
| Chem91               | Skywalker_OG            | Cherry             | Jack_Herrer              | Trainwreck              |
| chemdawg             | Snowcap                 | Cherry_Afghan      | Jack_Herrer              | Violator_Kush           |
| Chocolate_Kush       | Snowcap                 | Chocolope          | Jack_Skellington         | White_Cookies           |
| Crippd_Out_Cookies   | Sour_Diesel             | Chocolope          | Juicy_Fruit              | White_Widdow            |
| Cript_out_Cookies    | Sour_Patch_Kush         | Colombia_Rio_Negro | Lebanese                 | White_Widow             |
| Dead_Head_OG         | Sour_Willie             | Critical_Kush      | Lemon_Skunk              | Wonder_Woman            |
| Dog_Walker           | Sshrek                  | Critical_Kush      | Liberty_Haze             | XJ_13                   |
| Flo                  | The_Sauce               | Critical_Mass      | Lions_Tabernacle         | AC/DC                   |
| Girl_Scout_Cookie_#6 | The_Sauce               | Dr_Grinspoon       | Low_Ryder                | AZ_Star_#1              |
| Girl_Scout_Cookies   | Tora_Bora               | Durban_Poison      | LSD                      | Carmagnola              |
| Girl_Scout_Cookies   | WAF_B                   | Durban_Poison      | Mad_Cow                  | Carmagnola              |
| Goast_Train_Haze     | 4-Jack                  | Easy_Sativa        | Mango_Stomper            | Carmagnola              |
| Grapefruit           | Afghan_Mango            | Exodus_Cheese      | Maui_Waui                | Carmagnola              |
| Guido_OG             | Afghan_Mango            | G13                | Mazar                    | Carmagnola              |
| Headband             | Afghan_Mango            | G13_Haze-31        | Medical_Mass             | Carmagnola              |
| Hindu_Kush           | Alaskan_Thunderfuck     | Gin                | Melon_Gum                | Chinese_hemp            |
| Kandy_Kush           | Appalachian_Mad_Sun     | Girl_Scout_Cookies | Mexican_E                | Dagestani_hemp          |
| King_Chem            | Auto_AK47               | Glass_Slipper      | MO                       | EuroOil_2               |
| King_Louie_Cookies   | B-5                     | Golden_Goat        | Nuclear_Fruit            | Feral_Kansas            |
| Kool_Aid_Kush        | BC_HQ                   | Grand_Daddy_Purps  | Otto                     | Feral_Nebraska          |
| Kosher_Kush          | Black_Cherry            | Grape_AK-47        | Peaches_and_Cream        | Feral_Nebraska          |
| Kosher_Kush          | Black_Jack              | Grape_Ape          | Pineapple                | Finola                  |
| Kosher_Kush_#1       | Blue_Cheese             | Grape_Ape          | Pineapple_Express        | J7                      |
| Kunduz               | Blue_Dream              | Grape_Kush         | Pink_Lady                | J20                     |
| Larry_OG             | Blue_Dream              | Grape_Kush         | Pre-98_Bubba_Kush        | J28                     |
| Medibud              | Blue_OG                 | Green_Crack        | Purps                    | Kompolti_1              |
| OG_18                | Blueberry_DJ            | Green_Crack        | R4                       | Kompolti_2              |
| OG_Kush_1            | Bubble_Gum              | Green_Mandarine    | Red_Purps                | Sievers_Infinity        |
| Old_Skool_OG         | Bubble_Gum_XL           | Green_Poison       | Rocky_Mountain_Blueberry | US031                   |

300  
 301 Table 2. Sample names and FLOCK assignment to three groups, represented with different cell  
 302 colors. Green are BLDT, blue are NLDT and yellow are hemp.

Additionally we applied the admixture model based Bayesian clustering method of fastStructure to the same 195 samples<sup>56</sup>. The most likely population structure analysis of K=2 (Figure 2, Supplementary Table 1), shows consistent separation between BLDT and NLDT and hemp strains. Some hemp and NLDT strains were each assigned with near 100% population membership to the same population (Figure 2, light blue samples, Supplementary Table 1), despite the clear separation visualized in the tree and statistically significant mean between-group genetic distance measured (Table 1). The separation of BLDT and NLDT strains into fastStructure populations was stable when hemp samples were excluded from the analysis (Supplementary Table 1). Sawler et al.<sup>47</sup> used fastStructure to delineate hemp from drug-types as the major division of *Cannabis* diversity, and found two drug-type sub-groups within their samples when hemp types were excluded from the analysis. Likewise using a smaller dataset, Lynch<sup>61</sup> found support for K=3, consisting of two separate drug-type populations and hemp types, using the original Structure implementation<sup>62</sup> and the Evanno method to select the best value of K<sup>63</sup>. However, we caution that despite many claims for the availability of “landrace genetics” (strains) from *Cannabis* producers, breeders and seed sellers, these may or may not represent non-admixed individuals<sup>60</sup>—a situation that can be problematic for the Structure and fastStructure approaches<sup>62</sup>.

The GBS samples from Sawler et al.<sup>47</sup> appear to contain an additional divergent NLDT clade, with likely SE Asian origins (Supplementary Figures 3 and 4), that did not emerge from our main analyses. Due to very limited overlap between sequence fragments from the two GBS datasets, which results from using different restriction enzymes, we were required to re-analyze the Sawler data in combination with only our 67 WGS samples. A connection was made across



the two GBS analyses to this SE Asian NLDT group through two WGS samples (Dr. Grinspoon and Somali Taxi Cab, Figure 2, Supplementary Figures 3) that were included in both sets of GBS analyses. Although only 45 SNPs overlapped between both types of GBS data and the WGS data, a phylogeny of this limited alignment also supports the existence of an additional distinct SE Asian NLDT clade (Supplementary Figure 4). Collectively these analyses lend support to a total lower bound of four *Cannabis* populations, although clearly more extensive sampling with consistent sequencing is required to fully access standing biogeographic diversity.

**Tests of Tree Models.** To test hypotheses of tree-like evolution for the three genetic groups, we first applied the three-population test for admixture<sup>64</sup>, and found no evidence for admixture in any of the pairwise comparisons (positive  $f$  statistic values). Next we constructed maximum likelihood trees based on the aggregate SNP frequencies for the three genetic groups and simulated a variety of ‘migration’ events (0-10), but no simulation produced non-zero migration graph edges (Figure 3).  $F_{ST}$  analysis shows little divergence among lineages for most loci, but a substantial number of highly-divergent regions are unique to each clade (Figure 4). This reinforces the importance of using many, high-quality, single-copy regions of the genome, rather than smaller numbers of loci that could lead to less resolution or even misleading results. Although *lore*<sup>60</sup>, Figure 2 and Supplementary Figure 2 strongly suggest at least some individuals have hybrid origins, these tree models for the overall SNP frequencies of the population groups inferred by FLOCK (Table 2) imply each group contains strong genetic signals from ancestral biogeographic gene pools.

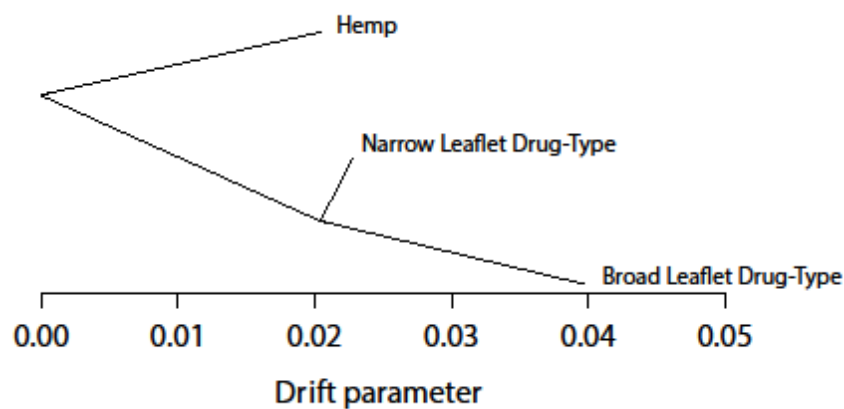

Figure 3. Maximum likelihood tree of three *Cannabis* populations. We found no evidence for extensive admixture or deviations from this tree model.

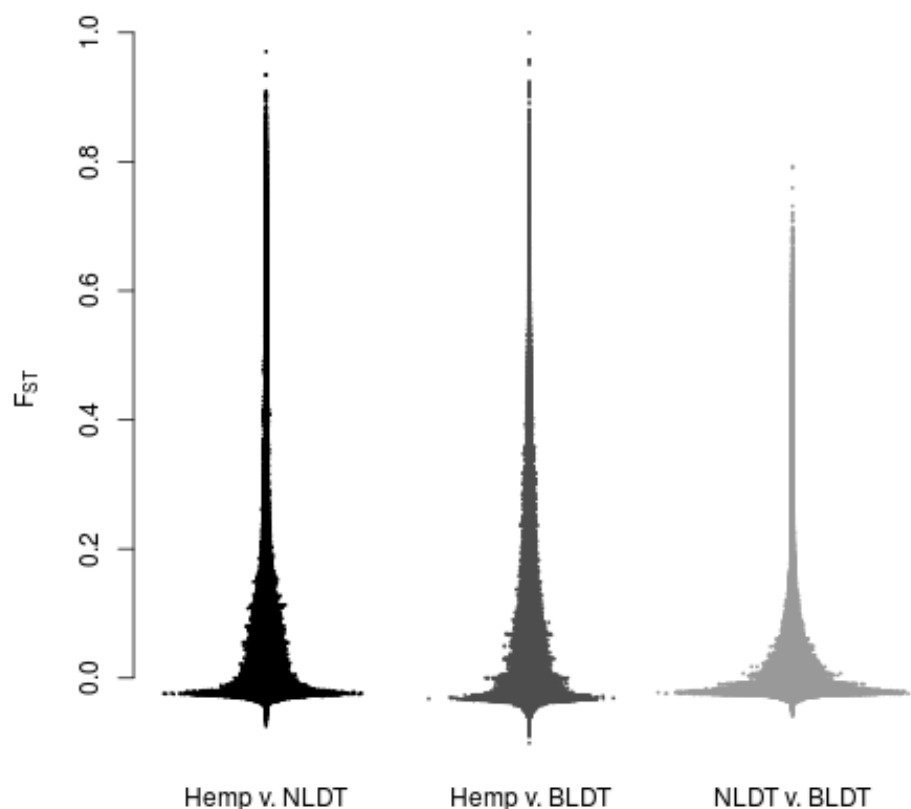

Figure 4. Distribution of Weir-Cockerham  $F_{ST}$  estimates for each population comparison. Each population pair has some portion of segregated sites.

Additional *Cannabis* diversity likely remains to be sampled. Notably absent from all genome sequence datasets published to date are putative *C. ruderalis*<sup>65</sup> samples. These are short weedy plants, with free shattering inflorescences found widely from northern Siberia, through central Asia and into Eastern Europe<sup>66</sup>. Whether these populations represent ancestral, pre-domesticated wild *Cannabis*, more recent feral escapes or some combination of both remains unclear. Even though we were not able to sample putative *C. ruderalis* populations, Finola is an early maturing seed hemp strain from Finland with purported northern Russian landrace ancestry<sup>60</sup>, and Low Ryder and Auto AK-47 are auto-flowering drug-type strains with possible

*C. ruderalis* heritage included in our samples (Table 2). Our analyses found Finola fits within the hemp group while Low Ryder and Auto AK-47 are close relatives of each other within the NLDT group (Supplementary Figure 3). Further genomic analyses are required to determine the extent to which *C. ruderalis* populations are genetically distinct from hemp and drug-type groups, and whether they may in fact harbor an ancestral wild-type gene pool from which European hemp varieties were domesticated<sup>5,16</sup>.

Broad leaflet Asian hemp is also underrepresented, although we included one putative Chinese hemp sample that occupies an area between the core hemp and BLDT populations (Table 2, Figure 2 and Supplementary Figure 2). Hillig's<sup>5</sup> analysis of alloenzymes concluded that Asian hemp strains were more similar to Asian drug-type strains than they were to narrow leaflet European hemp. Likewise, Gao et al.<sup>67</sup> found genetic dissimilarity between European hemp and Chinese hemp, using microsatellites, and showed at least several distinct groups of hemp occur across the vast geography of Asia. Overall, Asian and European hemp strains appear dissimilar genetically, possibly reflecting independent domestication events<sup>66</sup>.

One major complication obscuring the understanding of *Cannabis* diversity and history is the lack of information about the native range or ranges of *Cannabis*. In addition to divergent breeding efforts and human-vectored transport of seeds, the tendency of *Cannabis* is to escape into feral populations wherever human cultivation occurs in temperate climates<sup>68</sup>. This, coupled with wind pollination biology and no known reproductive barriers, makes the existence of pure wild native *Cannabis* populations unlikely. The weedy tendencies of *Cannabis* are exemplified by the mid-western USA populations of feral hemp that flourish despite the eradication efforts by the Drug Enforcement Agency, which have for decades totaled millions of plants removed per year. A comprehensive evaluation of *Cannabis* diversity, which includes feral and wild Eurasian

populations, is required to ascertain if the levels of divergence and gene flow are consistent with one or more origins of domestication<sup>5</sup>. Even if these extant populations are highly admixed with modern varieties, their study promises to offer insight into *Cannabis* ecology and evolution, given how different the selective regime of the feral setting is compared to that of agricultural fields. Considering the similar debates regarding the timing and origins of *Oryza* domestication that remain as of yet unresolved<sup>69</sup>, *Cannabis* requires substantially more work to unravel its complicated relationship with humans.

‘Indica’ and ‘sativa’ are commonly used terms ascribed to plants that have certain characteristics, often related to leaflet morphology and the perceived effects of consuming the plant<sup>8</sup>. However these names are rooted in taxonomic traditions dating to Linnaeus who first classified the genus as monotypic (*Cannabis sativa*) based on hemp specimens from Virginia and Europe<sup>70</sup>. Lamarck subsequently designated *Cannabis indica* to accommodate the shorter stature potent narrow leaflet drug-type plants from the Indian subcontinent<sup>71</sup>. Although currently the term ‘indica’ is typically used to refer to BLDTs, this biotype from the Hindu-Kush mountains<sup>14</sup> was not documented until a 1929 survey of Afghani agriculture by Vavilov<sup>72</sup>. This absence of historical documentation until the 20<sup>th</sup> century, a very narrow geographic range, and some evidence for a broader NLDT gene pool (Table 1, Supplementary Figures 3 and 4), suggest a separate and more recent origin of the BLDT clade. This origin could represent a domestication event of a wild or feral BLDT population, or perhaps hybridization events between NLDT and BLDT populations. Final resolution of *Cannabis* taxonomy will require complete assessment of standing global genetic diversity and experimental evaluation of reproductive compatibility across all major genetic groups<sup>73</sup>, in conjunction with morphological circumscriptions. Given the current absence of evidence for reproductive barriers, and overall limited genetic distances

between hemp and drug-type strains analyzed in this study we suggest continued monotypic treatment of plants in this genus as *Cannabis sativa* L. is warranted.

**Cannabinoid and Terpenoid Diversity.** THCA and CBDA are the most abundant cannabinoids produced by the majority of strains on the North American market today (Figure 5a), and both compounds show an impressive range of medicinal potential<sup>33,74</sup>, although endocannabinoid-based therapy trials have a history of significant rates of study withdraws and adverse effects<sup>75</sup>. Historical breeding efforts have resulted in mostly high THCA plants that produce strong intoxicating effects when consumed, and that synthesize only very low levels of alternative cannabinoids (Figure 5b). High CBDA plants have only recently become more available in North America over the last several years in response to demand. Interestingly, these high CBDA-producing plants form several clusters within the both the NLDT and BLDT groups, as well as within the hemp group (Supplementary Table 1), but rarely reach equivalent quantities total cannabinoid production as those found in high THCA plants (Figure 4a). The minor cannabinoids that are commonly assayed, CBGA, CBCA, THCVA and CBDVA are also of interest, despite strains producing high levels of these compounds being largely unavailable for research currently<sup>76</sup>. With at least 74 cannabinoids identified in *Cannabis*, modernized genetic and breeding techniques are required to diversify and optimize *Cannabis* varieties. Efforts should also be made to document and preserve feral, wild and heirloom populations that can serve as reservoirs of cultural and genetic diversity.

Aromatic terpenoids impart many of the characteristic fragrances to *Cannabis*, and possibly contribute to the effects of consumption<sup>2</sup>. Terpenoids are synthesized in many plant species, and play a role in relieving various abiotic and biotic stresses through direct and indirect

mechanisms<sup>2</sup>. Our analysis of strains sharing common genetic groups shows that each group has a distinct terpenoid profile (Figure 5c and Supplementary Figure 5). We found NLDTs to contain significantly more  $\beta$ -myrcene and  $\alpha$ -terpinolene than BLDTs, although interestingly the two hemp strains for which we analyzed chemical data for had significantly more  $\beta$ -myrcene than either drug-type group (Figure 5c). Similarly Hillig<sup>77</sup> found NLDTs to yield significantly more  $\beta$ -myrcene than Afghani BLDTs, yet European hemp and un-cultivated accessions labeled as *C. ruderalis* contained the highest levels. Hillig also reported that Afghani BLDTs contained the highest levels of guaicol and eudesmol isomers, which we did not measure, although we found BLDTs contained more linalool than NLDTs or hemp. Understanding the ecological functions and evolutionary origins of terpenoids and cannabinoids in *Cannabis* could improve therapeutic potential, and possibly reduce the need for pesticide application during cultivation.

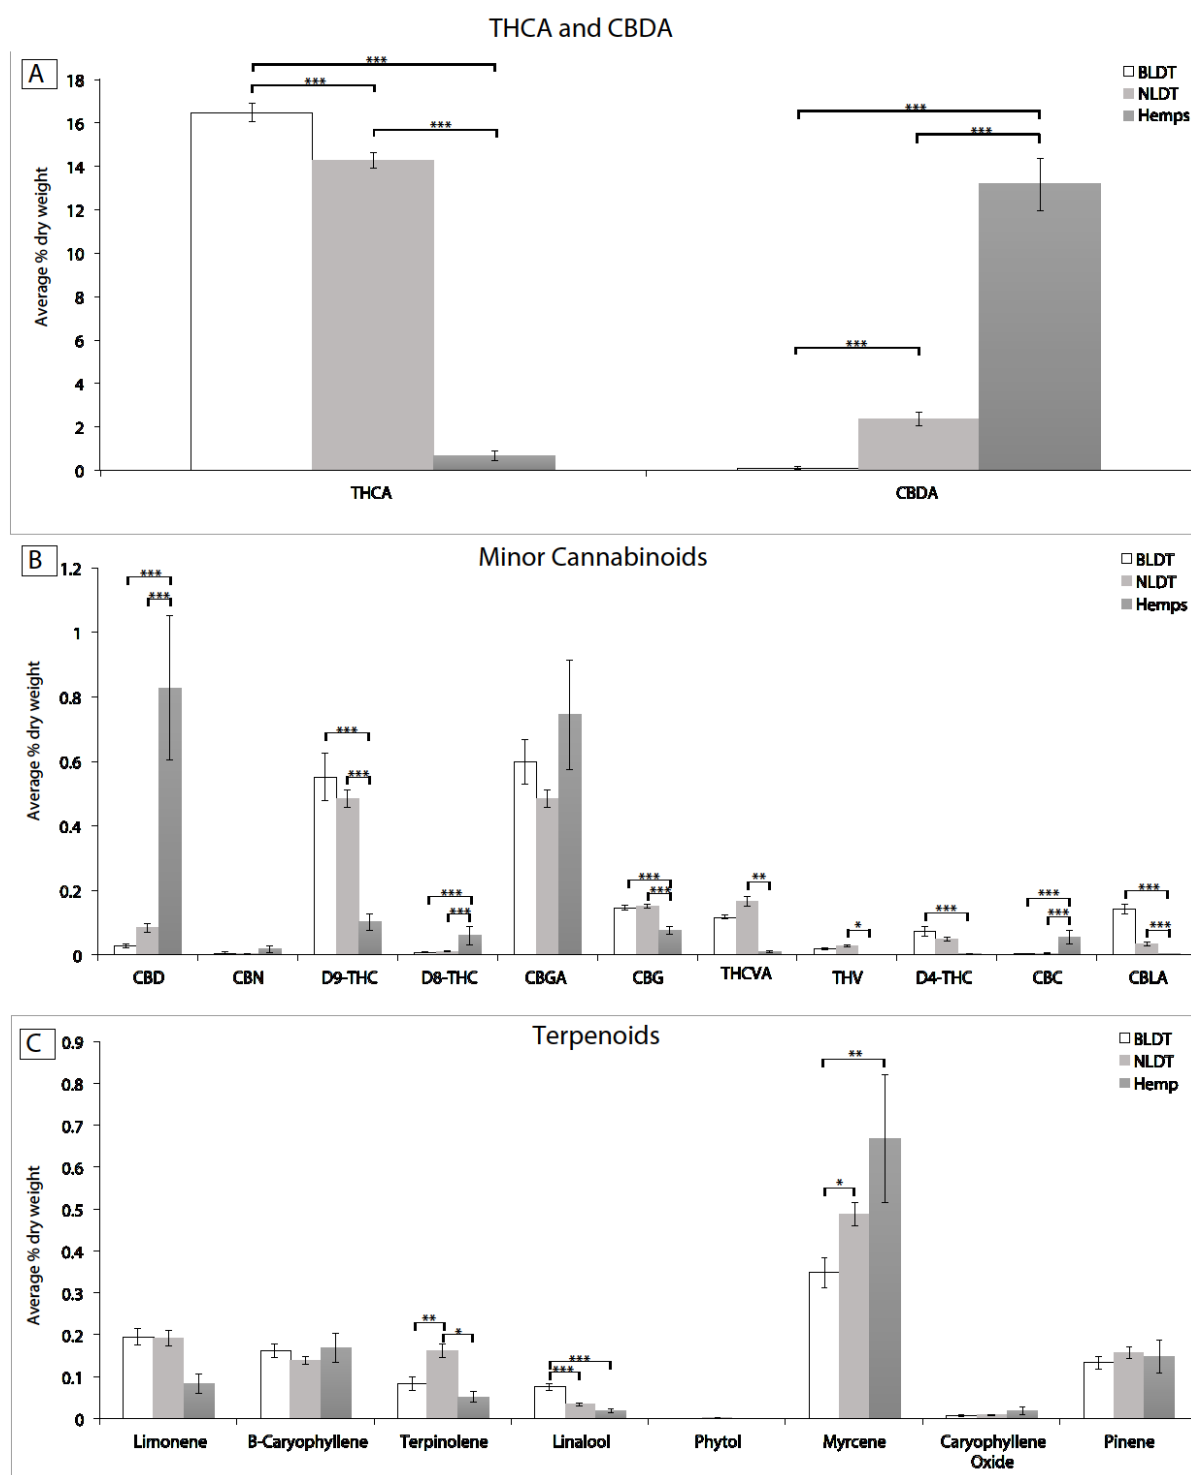

Figure 5. Average percentage of mass for dried and un-pollinated female flowers of *Cannabis* genetic groups. (a) THCA and CBDA cannabinoids (b) Minor cannabinoids (c) Terpenoids. THCA = delta-9-tetrahydrocannabinolic acid. CBDA = cannabidiolic acid. CBD = cannabidiol.



CBN = cannabinol. D9-THC = delta-9-tetrahydrocannabinol. D8-THC = delta-8-tetrahydrocannabinol. CBGA = cannabigerolic acid. CBG = cannabigerol. THCVA = Tetrahydrocannabivarin carboxylic acid. THCV = Tetrahydrocannabivarin. D4-THC = delta-4-tetrahydrocannabinol. CBC = cannabichromene. CBLA = cannabicyclolic acid.

**Conclusions.** *Cannabis* genomics offers a window into the past, but also a road forward.

Although historical and clandestine breeding efforts have been clearly successful in many regards<sup>21,31</sup>, *Cannabis* lags decades behind other major crop species in many other respects.

Developing stable *Cannabis* lines capable of producing the full range of potentially therapeutic cannabinoids is important for the research and medical communities, which currently lacks access to diverse high-quality material in the USA<sup>78</sup>.

In this paper we extended the initial *Cannabis* genome study<sup>10</sup>, by re-mapping WGS and GBS sequence reads to the existing PK draft scaffolds, to understand diversity and evolutionary relationships among the major lineages. Although hybridization of cultivated varieties<sup>60</sup> and human transport of seeds across the globe was hypothesized to have obscured much of the ancestral genetic signal<sup>13</sup>, we found significant evidence for apparent ancestral signals in genomic data derived largely from modern cultivated varieties (Table 2, Figures 2 and 3). Re-analysis of previously published GBS data<sup>47</sup> provides additional limited evidence for a fourth group (Supplementary Figures 4 and 5). Interestingly, unique cannabinoid and terpenoid profiles were associated with three of the genetic groups, lending support to their validity, despite the limitations of our sampling scheme. Overall, we hope the publicly available data and analyses from this study will facilitate the continued research on the history of this controversial plant and the development of the agricultural and therapeutic potential of *Cannabis*.

Acknowledgments: We thank Ben Holmes of Centennial Seeds; Devin Liles, Carter Casad and Jan Cole of The Farm; Ashley Edwards of Ward, Colorado; Jake Salazar of MMJ America; Kevin McKernan of Medicinal Genomics; David Salama, Ashley and Matt Rheingold of Headquarters; Ezra Huscher; Nico Escondido and Bob Sievers for providing DNA samples. We thank Reggie Gaudino of Steep Hill for assistance with the chemical data. This project was supported by donations to the University of Colorado Foundation gift fund 13401977-Fin8 to NCK.

Author contributions: RCL, DV, KHW and NCK designed the project. CJS and MJG collected samples. KHW generated DNA sequencing libraries. RCL, NCK and SBT performed bioinformatics analyses. KdC, DPL and TCR generated chemical data. DV and SBT performed chemical data analyses. RCL, DV and NCK wrote the paper.

Competing financial interests: RCL is presently an employee of Medicinal Genomics Corporation. DV is the founder of the non-profit Agricultural Genomics Foundation. CJS and MJG are owners of Marigene Inc. TCR is an employee of SC Labs Inc. KdC and DL are employees of Steep Hill Labs. NCK is a board member of the non-profit Agricultural Genomics Foundation.

## References

1. Li, H. L. An archaeological and historical account of cannabis in China. *Econ. Bot.* **28**, 437–448 (1973).
2. Russo, E. B. Taming THC: Potential cannabis synergy and phytocannabinoid-terpenoid entourage effects. *Br. J. Pharmacol.* **163**, 1344–1364 (2011).
3. Russo, E. B. History of cannabis and its preparations in saga, science, and sobriquet. *Chem. Biodivers.* **4**, 1614–1648 (2007).

- 502 4. Schultes, R. E., Klein, M. W., Plowman, T. & Lockwood, T. Cannabis: an example of taxonomic  
503 neglect. *Harvard Univ. Bot. Museum Leaflet*. **23**, 337–367 (1974).
- 504 5. Hillig, K. W. Genetic evidence for speciation in Cannabis (Cannabaceae). *Genet. Resour. Crop Evol.*  
505 **52**, 161–180 (2005).
- 506 6. Cherniak, L. *The Great Books of Cannabis vol. I, Book II*. (1982).
- 507 7. de Meijer, E. P. M. *et al.* The Inheritance of Chemical Phenotype in Cannabis sativa L. *Genetics*  
508 **346**, 335–346 (2003).
- 509 8. Habib, R., Finighan, R. & Davenport, S. Testing for Psychoactive Agents. (2013). at  
510 <[http://liq.wa.gov/publications/Marijuana/BOTEC reports/1c-Testing-for-Psychoactive-Agents-](http://liq.wa.gov/publications/Marijuana/BOTEC%20reports/1c-Testing-for-Psychoactive-Agents-Final.pdf)  
511 [Final.pdf](http://liq.wa.gov/publications/Marijuana/BOTEC%20reports/1c-Testing-for-Psychoactive-Agents-Final.pdf)>
- 512 9. Small, E. & Cronquist, A. A practical and natural taxonomy for Cannabis. *Taxon* **25**, 405–435  
513 (1976).
- 514 10. van Bakel, H. *et al.* The draft genome and transcriptome of Cannabis sativa. *Genome Biol.* **12**,  
515 R102 (2011).
- 516 11. Small, E. Evolution and Classification of Cannabis sativa ( Marijuana , Hemp ) in Relation to  
517 Human Utilization. *Bot. Rev.* **81**, 189–294 (2015).
- 518 12. Clarke, R. C. & Merlin, M. D. Letter to the Editor: Small, Ernest. 2015. Evolution and Classification  
519 of Cannabis sativa (Marijuana, Hemp) in Relation to Human Utilization. Botanical Review 81(3):  
520 189-294. *Bot. Rev.* **81**, 295–305 (2015).
- 521 13. Small, E. Response to the Erroneous Critique of my Cannabis Monograph by R. C. Clarke and M.D.  
522 Merlin. *Bot. Rev.* **81**, 306–316 (2015).
- 523 14. Clarke, R. C. & Merlin, M. D. in *Cannabis Evolution and Ethnobotany* 13–26 (2013).
- 524 15. Glanzman, A. Discover Himalaya’s Outlawed Marijuana Fields. *Time* (2015). at  
525 <<http://time.com/3736616/discover-himalayas-illegal-marijuana-fields>>
- 526 16. Hillig, K. W. & Mahlberg, P. G. A chemotaxonomic analysis of cannabinoid variation in Cannabis  
527 (Cannabaceae). *Am. J. Bot.* **91**, 966–975 (2004).
- 528 17. Bauer, R., Salo-Ahen, K. & Bauer, O. CB Receptor Ligands from Plants. *Curr. Top. Med. Chem.* **8**,  
529 173–186 (2008).
- 530 18. Radwan, M. M. *et al.* Isolation and characterization of new cannabis constituents from a high  
531 potency variety. *Planta Med.* **74**, 267–272 (2008).
- 532 19. ElSohly, M. a. & Slade, D. Chemical constituents of marijuana: The complex mixture of natural  
533 cannabinoids. *Life Sci.* **78**, 539–548 (2005).
- 534 20. Poklis, J. L., Thompson, C. C., Long, K. a, Lichtman, A. H. & Poklis, A. Disposition of  
535 cannabichromene, cannabidiol, and  $\Delta^9$ -tetrahydrocannabinol and its metabolites in mouse brain  
536 following marijuana inhalation determined by high-performance liquid chromatography-tandem  
537 mass spectrometry. *J. Anal. Toxicol.* **34**, 516–20 (2010).
- 538 21. Mehmedic, Z. *et al.* Potency trends of  $\Delta^9$ -THC and other cannabinoids in confiscated cannabis  
539 preparations from 1993 to 2008. *J. Forensic Sci.* **55**, 1209–1217 (2010).

- 540 22. McPartland, J. M., Matias, I., Di Marzo, V. & Glass, M. Evolutionary origins of the  
541 endocannabinoid system. *Gene* **370**, 64–74 (2006).
- 542 23. Mechoulam, R. & Gaoni, Y. Recent advances in the chemistry of hashish. *Chemie Org. Naturstoffe*  
543 **25**, 175–213 (1967).
- 544 24. Volkow, N. D., Baler, R. D., Compton, W. M. & Weiss, S. R. B. Adverse Health Effects of Marijuana  
545 Use. *N. Engl. J. Med.* **370**, 2219–2227 (2014).
- 546 25. Berry, E. M. & Mechoulam, R. Tetrahydrocannabinol and endocannabinoids in feeding and  
547 appetite. *Pharmacol. Ther.* **95**, 185–190 (2002).
- 548 26. Zogopoulos, P., Vasileiou, I., Patsouris, E. & Theocharis, S. E. The role of endocannabinoids in pain  
549 modulation. *Fundam. Clin. Pharmacol.* **27**, 64–80 (2013).
- 550 27. Tramèr, M. R. *et al.* Cannabinoids for control of chemotherapy induced nausea and vomiting:  
551 quantitative systematic review. *BMJ* **323**, 16–21 (2001).
- 552 28. Di Marzo, V., Bifulco, M. & De Petrocellis, L. The endocannabinoid system and its therapeutic  
553 exploitation. *Nat. Rev. Drug Discov.* **3**, 771–784 (2004).
- 554 29. Pacher, P. & Mechoulam, R. Is lipid signaling through cannabinoid 2 receptors part of a protective  
555 system? *Prog. Lipid Res.* **50**, 193–211 (2011).
- 556 30. De Petrocellis, L. *et al.* Effects of cannabinoids and cannabinoid-enriched *Cannabis* extracts on  
557 TRP channels and endocannabinoid metabolic enzymes. *Br. J. Pharmacol.* **163**, 1479–1494 (2011).
- 558 31. Swift, W., Wong, A., Li, K. M., Arnold, J. C. & McGregor, I. S. Analysis of Cannabis Seizures in NSW,  
559 Australia: Cannabis Potency and Cannabinoid Profile. *PLoS One* **8**, 1–9 (2013).
- 560 32. Rustichelli, C., Ferioli, V., Vezzadini, F., Rossi, M. C. & Gamberini, G. Simultaneous separation and  
561 identification of hashish constituents by coupled liquid chromatography-mass spectrometry  
562 (HPLC-MS). *Chromatographia* **43**, 129–134 (1996).
- 563 33. Devinsky, O. *et al.* Cannabidiol: Pharmacology and potential therapeutic role in epilepsy and  
564 other neuropsychiatric disorders. *Epilepsia* **55**, 791–802 (2014).
- 565 34. Pertwee, R. G. The diverse CB1 and CB2 receptor pharmacology of three plant cannabinoids:  
566 delta9-tetrahydrocannabinol, cannabidiol and delta9-tetrahydrocannabivarin. *Br. J. Pharmacol.*  
567 **153**, 199–215 (2008).
- 568 35. Fellermeier, M., Eisenreich, W., Bacher, A. & Zenk, M. H. Biosynthesis of cannabinoids. *Eur. J.*  
569 *Biochem.* **268**, 1596–1604 (2001).
- 570 36. Staginnus, C., Zörntlein, S. & de Meijer, E. A PCR marker linked to a THCA synthase polymorphism  
571 is a reliable tool to discriminate potentially THC-rich plants of *Cannabis sativa* L. *J. Forensic Sci.*  
572 **59**, 919–26 (2014).
- 573 37. Weiblen, G. D. *et al.* Gene duplication and divergence affecting drug content in *Cannabis sativa*.  
574 *New Phytol.* **208**, 2141–2250 (2015).
- 575 38. Onofri, C., de Meijer, E. P. M. & Mandolino, G. Sequence heterogeneity of cannabidiolic- and  
576 tetrahydrocannabinolic acid-synthase in *Cannabis sativa* L. and its relationship with chemical  
577 phenotype. *Phytochemistry* **116**, 57–68 (2015).
- 578 39. Borrelli, F. *et al.* Colon carcinogenesis is inhibited by the TRPM8 antagonist cannabigerol, a

- 579 Cannabis - derived non-psychotropic cannabinoid. *Carcinogenesis* **35**, 2787–2797 (2014).
- 580 40. Izzo, A. a. *et al.* Inhibitory effect of cannabichromene, a major non-psychotropic cannabinoid  
581 extracted from Cannabis sativa, on inflammation-induced hypermotility in mice. *Br. J. Pharmacol.*  
582 **166**, 1444–1460 (2012).
- 583 41. Mcpartland, J. M., Duncan, M., Marzo, V. Di & Pertwee, R. G. Are cannabidiol and  $\Delta^9$  -  
584 tetrahydrocannabivarin negative modulators of the endocannabinoid system ? A systematic  
585 review. 737–753 (2015). doi:10.1111/bph.12944
- 586 42. de Meijer, E. P. M., Hammond, K. M. & Sutton, a. The inheritance of chemical phenotype in  
587 Cannabis sativa L. (IV): cannabinoid-free plants. *Euphytica* **168**, 95–112 (2009).
- 588 43. de Meijer, E. P. M., Hammond, K. M. & Micheler, M. The inheritance of chemical phenotype in  
589 Cannabis sativa L. (III): variation in cannabichromene proportion. *Euphytica* **165**, 293–311 (2008).
- 590 44. De Meijer, E. P. M., Hammond, K. M. & Sutton, a. The inheritance of chemical phenotype in  
591 Cannabis sativa L. (IV): Cannabinoid-free plants. *Euphytica* **168**, 95–112 (2009).
- 592 45. Hazekamp, a. & Fisdick, J. T. Cannabis - from cultivar to chemovar. *Drug Test. Anal.* 660–667  
593 (2012). doi:10.1002/dta.407
- 594 46. Sakamoto, K., Akiyama, Y., Fukui, K., Kamada, H. & Satoh, S. Characterization; Genome Sizes and  
595 Morphology of Sex Chromosomes in Hemp (Cannabis sativa L.). *Cytologia (Tokyo)*. **63**, 459–464  
596 (1998).
- 597 47. Sawler, J. *et al.* The Genetic Structure of Marijuana and Hemp. *PLoS One* 1–9 (2015).  
598 doi:10.1371/journal.pone.0133292
- 599 48. Parchman, T. L., Gompert, Z., Mudge, J. & Schilkey, F. D. Genome-wide association genetics of an  
600 adaptive trait in lodgepole pine. *Mol. Ecol.* **21**, 2991–3005 (2012).
- 601 49. Bolger, A. M., Lohse, M. & Usadel, B. Genome analysis Trimmomatic : a flexible trimmer for  
602 Illumina sequence data. *Bioinformatics* **30**, 2114–2120 (2014).
- 603 50. Li, H. & Durbin, R. Fast and accurate short read alignment with Burrows-Wheeler transform.  
604 *Bioinformatics* **25**, 1754–1760 (2009).
- 605 51. Li, H. *et al.* The Sequence Alignment/Map format and SAMtools. *Bioinformatics* **25**, 2078–2079  
606 (2009).
- 607 52. Danecek, P. *et al.* The variant call format and VCFtools. *Bioinformatics* **27**, 2156–8 (2011).
- 608 53. Purcell, S. *et al.* PLINK: A Tool Set for Whole-Genome Association and Population-Based Linkage  
609 Analyses. *Am. J. Hum. Genet.* **81**, 559–575 (2007).
- 610 54. Huson, D. H. & Bryant, D. Application of phylogenetic networks in evolutionary studies. *Mol. Biol.*  
611 *Evol.* **23**, 254–267 (2006).
- 612 55. Tamura, K., Stecher, G., Peterson, D., Filipski, A. & Kumar, S. MEGA6: Molecular Evolutionary  
613 Genetics Analysis Version 6.0. *Mol. Biol. Evol.* **30**, 2725–2729 (2013).
- 614 56. Raj, A., Stephens, M. & Pritchard, J. K. fastSTRUCTURE: Variational Inference of Population  
615 Structure in Large SNP Data Sets. *Genetics* **197**, 573–589 (2014).
- 616 57. Duchesne, P. & Turgeon, J. FLOCK Provides Reliable Solutions to the ‘Number of Populations’

- 617 Problem. *J. Hered.* **103**, 734–743 (2012).
- 618 58. Pickrell, J. K. & Pritchard, J. K. Inference of Population Splits and Mixtures from Genome-Wide  
619 Allele Frequency Data. *PLoS Genet.* **8**, e1002967 (2012).
- 620 59. Hazekamp, A., Peltenburg, A., Verpoorte, R. & Giroud, C. Chromatographic and Spectroscopic  
621 Data of Cannabinoids from Cannabis sativa L. *J. Liq. Chromatogr. Relat. Technol.* **28**, 2361–2382  
622 (2005).
- 623 60. Clarke, R. C. & Merlin, M. D. in *Cannabis Evolution and Ethanobotany* 295–309 (2013).
- 624 61. Lynch, R. C. Genomics of Adaptation and Diversification. (2015).
- 625 62. Pritchard, J. K., Stephens, M. & Donnelly, P. Inference of population structure using multilocus  
626 genotype data. *Genetics* **155**, 945–959 (2000).
- 627 63. Evanno, G., Regnaut, S. & Goudet, J. Detecting the number of clusters of individuals using the  
628 software STRUCTURE: A simulation study. *Mol. Ecol.* **14**, 2611–2620 (2005).
- 629 64. Reich, D., Thangaraj, K., Patterson, N., Price, A. L. & Singh, L. Reconstructing Indian population  
630 history. *Nature* **461**, 489–494 (2009).
- 631 65. Janischevsky, D. E. Cannabis Ruderalis. *Proc. Saratov* **2**, 14–15 (1924).
- 632 66. Clarke, R. C. & Merlin, M. D. in *Cannabis Evolution and Ethanobotany* 311–331 (2013).
- 633 67. Gao, C. *et al.* Diversity Analysis in Cannabis sativa Based on Large- Scale Development of  
634 Expressed Sequence Tag-Derived Simple Sequence Repeat Markers. **9**, (2014).
- 635 68. Small, E., Pocock, T. & Cavers, P. The biology of Canadian weeds. 119. Cannabis sativa L. *Can. J.*  
636 *plant Sci.* (2003). at <<http://pubs.aic.ca/doi/abs/10.4141/P02-021>>
- 637 69. Gross, B. L. & Zhao, Z. Archaeological and genetic insights into the origins of domesticated rice.  
638 *Proc. Natl. Acad. Sci. U. S. A.* **111**, 6190–7 (2014).
- 639 70. Linnaeus, C. *Species Plantarum.* (1753).
- 640 71. Lamarck, J. B. Encyclopédie méthodique: botanique. (1783).
- 641 72. Vavilov, N. I. & Bukinich, D. D. Agricultural Afganistan. *Bull. Appl. Bot. Genet. Plant Breed.* **33**,  
642 (1929).
- 643 73. Rieseberg, L. H. & Willis, J. H. Plant speciation. *Science* **317**, 910–914 (2007).
- 644 74. Di Marzo, V., Bifulco, M. & De Petrocellis, L. The endocannabinoid system and its therapeutic  
645 exploitation. *Nat. Rev. Drug Discov.* **3**, 771–784 (2004).
- 646 75. Wade, D. T., Makela, P. M., House, H., Bateman, C. & Robson, P. Long-term use of a cannabis-  
647 based medicine in the treatment of spasticity and other symptoms in multiple sclerosis. *Mult.*  
648 *Scler.* **12**, 639–645 (2006).
- 649 76. Abrams, D. I. *et al.* Vaporization as a smokeless cannabis delivery system: a pilot study. *Clin.*  
650 *Pharmacol. Ther.* **82**, 572–578 (2007).
- 651 77. Hillig, K. W. A chemotaxonomic analysis of terpenoid variation in Cannabis. *Biochem. Syst. Ecol.*  
652 **32**, 875–891 (2004).
- 653 78. Nutt, D. J., King, L. a & Nichols, D. E. Treatment Innovation. **14**, 577–585 (2013).
